# Supplementary material
Source: publisher site journal article supplement (https://www.spandidos-publications.com/8097/downloadSupplementary)
Supplement: Supplementary file 1 [file downloadSupplementary]

Table SI. Detailed clinically relevant data for the patients with glioma in the CGGA and TCGA datasets.

| Clinical characteristic | CGGA (n=686) |               | TCGA (n=592) |               |
|-------------------------|--------------|---------------|--------------|---------------|
|                         | Cases, n     | Proportion, % | Cases, n     | Proportion, % |
| WHO grade               |              |               |              |               |
| II                      | 177          | 25.8          | 211          | 35.6          |
| III                     | 226          | 32.9          | 238          | 40.2          |
| IV                      | 283          | 41.3          | 143          | 24.2          |
| Sex                     |              |               |              |               |
| Male                    | 399          | 58.2          | 344          | 58.1          |
| Female                  | 287          | 41.8          | 248          | 41.9          |
| Age, years              |              |               |              |               |
| ≥42                     | 379          | 55.2          | 349          | 59.0          |
| <42                     | 307          | 44.8          | 243          | 41.0          |
| IDH mutation            |              |               |              |               |
| Yes                     | 371          | 54.1          | 372          | 62.8          |
| No                      | 315          | 45.9          | 220          | 37.2          |
| 1p19q codeletion        |              |               |              |               |
| Yes                     | 141          | 20.6          | 149          | 25.2          |
| No                      | 545          | 79.4          | 443          | 74.8          |
| MGMT methylation        |              |               |              |               |
| Yes                     | 386          | 56.3          |              |               |
| No                      | 300          | 43.7          |              |               |
| Radiotherapy            |              |               |              |               |
| Yes                     | 544          | 79.3          |              |               |
| No                      | 142          | 20.7          |              |               |
| Chemotherapy            |              |               |              |               |
| Yes                     | 501          | 73.0          |              |               |
| No                      | 185          | 27.0          |              |               |

CGGA, Chinese Glioma Genome Atlas; TCGA, The Cancer Genome Atlas; WHO, World Health Organization; IDH, isocitrate dehydrogenase; MGMT, O-6-methylguanine-DNA methyltransferase.
